# Supplementary material for: Structural assignment, and electronic and magnetic properties of lanthanide metal doped silicon heptamers Si7M0/− with M = Pr, Gd and Ho
Source: Royal Society of Chemistry journal article supplement (doi:10.1039/c6cp05570b), 2016-01-01
Supplement: c6cp05570b1.pdf [file c6cp05570b1.pdf]

## Supplementary Information

### Structural Assignment, Electronic and Magnetic Properties of Lanthanide

#### Metal Doped Silicon Heptamers $\text{Si}_7\text{M}^{0/-}$ with $\text{M} = \text{Pr, Gd and Ho}$

Tran Dieu Hang, Huynh Minh Hung, Minh Tho Nguyen<sup>1</sup>

*Department of Chemistry, KU Leuven, Celestijnenlaan 200F, B-3001 Leuven, Belgium*

Tables contain natural electron configuration, charge, magnetic moment ( $\mu_B$ ) of  $6s$ ,  $4f$ ,  $5d$ ,  $6p$  and  $6d$  states of M atoms with  $\text{M} = \text{Pr, Gd, Ho}$ , along with total magnetic moment of the ground state structure of  $\text{Si}_7\text{M}^{0/-}$  clusters (PBE) and Cartesian coordinates of the ground state structures of the clusters considered. Figures display the shapes, electronic states and relative energies of the most stable forms of the neutral and anionic  $\text{Si}_7\text{M}^{0/-}$  clusters using the B3LYP, PBE, BPW91, BP86 and TPSSh functionals.

**Table S1.** The first VDE and ADE of the anionic  $\text{Si}_7\text{M}^{0/-}$  clusters with  $\text{M} = \text{Pr, Gd, Ho}$  obtained using B3LYP, PBE, BPW91, BP86 and TPSSh functionals.

| Species                             | ADE   |      |       |      |       |               | VDE   |      |       |      |       |      |
|-------------------------------------|-------|------|-------|------|-------|---------------|-------|------|-------|------|-------|------|
|                                     | B3LYP | PBE  | BPW91 | BP86 | TPSSh | Exp           | B3LYP | PBE  | BPW91 | BP86 | TPSSh | Exp  |
| <b>PrSi<sub>7</sub><sup>-</sup></b> | 2.50  | 2.39 | 2.48  | 2.51 | 2.42  | $2.4 \pm 0.1$ | 2.70  | 2.64 | 2.74  | 2.76 | 2.85  | 2.60 |
| <b>GdSi<sub>7</sub><sup>-</sup></b> | 2.42  | 2.44 | 2.42  | 2.53 | 2.49  | $2.3 \pm 0.1$ | 2.62  | 2.69 | 2.69  | 2.70 | 2.75  | 2.55 |
| <b>HoSi<sub>7</sub><sup>-</sup></b> | 2.42  | 2.37 | 2.50  | 2.55 | 2.31  | $2.4 \pm 0.1$ | 2.69  | 2.65 | 2.54  | 2.66 | 2.53  | 2.60 |

<sup>1</sup>Email: [minh.nguyen@kuleuven.be](mailto:minh.nguyen@kuleuven.be),

**Table S2.** Natural electron configuration and net charge of M atom of the ground state structure of  $\text{Si}_7\text{M}^{0/-}$  clusters with M = Pr, Gd, Ho, along with total magnetic moments (PBE).

| Clusters                            | Electron configuration                                        | Charge |
|-------------------------------------|---------------------------------------------------------------|--------|
| <b>PrSi<sub>7</sub></b>             | $[\text{core}]6s^{0.35}4f^{2.66}5d^{1.12}6p^{0.08}6d^{0.01}$  | 1.18   |
| <b>PrSi<sub>7</sub><sup>-</sup></b> | $[\text{core}]6s^{0.44}4f^{2.37}5d^{1.95}6p^{0.19}6d^{0.01}$  | 0.88   |
| <b>GdSi<sub>7</sub></b>             | $[\text{core}]6s^{1.06}4f^{7.02}5d^{1.02}6p^{0.15}6d^{0.01}$  | 0.44   |
| <b>GdSi<sub>7</sub><sup>-</sup></b> | $[\text{core}]6s^{0.90}4f^{7.02}5d^{1.69}6p^{0.26}6d^{0.02}$  | 0.35   |
| <b>HoSi<sub>7</sub></b>             | $[\text{core}]6s^{0.53}4f^{10.91}5d^{0.51}6p^{0.10}6d^{0.01}$ | 0.72   |
| <b>HoSi<sub>7</sub><sup>-</sup></b> | $[\text{core}]6s^{0.60}4f^{10.43}5d^{1.43}6p^{0.25}6d^{0.02}$ | 0.35   |

**Table S3.** Magnetic moment ( $\mu_B$ ) of 6s, 4f, 5d, 6p and 6d states of M atom with M = Pr, Gd, Ho, along with total magnetic moment of the ground state structure of  $\text{Si}_7\text{M}^{0/-}$  clusters (PBE).

| Clusters                       | Magnetic moment of M atoms |      |      |      |      |       | Molecule ( $\mu_B$ ) |
|--------------------------------|----------------------------|------|------|------|------|-------|----------------------|
|                                | 6s                         | 4f   | 5d   | 6p   | 6d   | Total |                      |
| PrSi <sub>7</sub>              | 0.01                       | 2.60 | 0.16 | 0.00 | 0.01 | 2.78  | 3                    |
| PrSi <sub>7</sub> <sup>-</sup> | 0.01                       | 2.19 | 0.07 | 0.00 | 0.01 | 2.28  | 2                    |
| GdSi <sub>7</sub>              | 0.79                       | 6.97 | 0.28 | 0.03 | 0.01 | 8.08  | 8                    |
| GdSi <sub>7</sub> <sup>-</sup> | 0.44                       | 6.96 | 0.23 | 0.01 | 0.00 | 7.64  | 7                    |
| HoSi <sub>7</sub>              | 0.03                       | 3.07 | 0.02 | 0.00 | 0.00 | 3.12  | 3                    |
| HoSi <sub>7</sub> <sup>-</sup> | 0.02                       | 3.56 | 0.15 | 0.01 | 0.00 | 3.74  | 4                    |

**Table S4.** Cartesian Coordinates (angstrom) of the most stable neutrals and anions  $\text{Si}_7\text{M}^{0/-}$  using B3LYP functional.

| Structure                           | Geometry (Cartesian Coordinates) |              |              |              |
|-------------------------------------|----------------------------------|--------------|--------------|--------------|
| <b>PrSi<sub>7</sub></b>             | 14                               | 0.099494000  | 1.340607000  | -1.358769000 |
|                                     | 14                               | 0.543037000  | 1.009280000  | 1.100445000  |
|                                     | 14                               | 0.944951000  | -1.001393000 | -0.603210000 |
|                                     | 14                               | 2.174305000  | -0.602201000 | 1.620952000  |
|                                     | 14                               | 3.285801000  | -1.128141000 | -0.549954000 |
|                                     | 14                               | -1.314567000 | 2.183186000  | 0.435381000  |
|                                     | 14                               | 2.401222000  | 1.079125000  | -0.526878000 |
|                                     | 59                               | -1.930159000 | -0.683500000 | -0.027992000 |
| <b>PrSi<sub>7</sub><sup>-</sup></b> | 14                               | 2.193521000  | -2.322666000 | 0.000099000  |
|                                     | 14                               | 1.619988000  | 0.000001000  | -0.000012000 |
|                                     | 14                               | 0.252435000  | 1.655748000  | -1.265984000 |
|                                     | 14                               | 0.252512000  | -1.655842000 | -1.265983000 |
|                                     | 14                               | 0.252515000  | 1.655830000  | 1.265988000  |
|                                     | 14                               | 0.252443000  | -1.655736000 | 1.265989000  |
|                                     | 14                               | 2.193516000  | 2.322671000  | -0.000096000 |
|                                     | 59                               | -1.665034000 | -0.000001000 | 0.000000000  |
| <b>GdSi<sub>7</sub></b>             | 14                               | 0.564372000  | 1.875067000  | -1.109465000 |
|                                     | 14                               | 0.452321000  | 0.932929000  | 1.196596000  |
|                                     | 14                               | 1.048348000  | -0.563482000 | -1.062542000 |
|                                     | 14                               | 1.375054000  | -1.265266000 | 1.311517000  |
|                                     | 14                               | 3.176531000  | -1.270151000 | -0.426302000 |
|                                     | 14                               | -1.271601000 | 2.215778000  | 0.448192000  |
|                                     | 14                               | 2.618123000  | 0.997591000  | 0.159605000  |
|                                     | 64                               | -1.741939000 | -0.639290000 | -0.113225000 |
| <b>GdSi<sub>7</sub><sup>-</sup></b> | 14                               | 0.564372000  | 1.875067000  | -1.109465000 |
|                                     | 14                               | 0.452321000  | 0.932929000  | 1.196596000  |
|                                     | 14                               | 1.048348000  | -0.563482000 | -1.062542000 |
|                                     | 14                               | 1.375054000  | -1.265266000 | 1.311517000  |
|                                     | 14                               | 3.176531000  | -1.270151000 | -0.426302000 |
|                                     | 14                               | -1.271601000 | 2.215778000  | 0.448192000  |
|                                     | 14                               | 2.618123000  | 0.997591000  | 0.159605000  |
|                                     | 64                               | -1.741939000 | -0.639290000 | -0.113225000 |
| <b>HoSi<sub>7</sub></b>             | 14                               | -2.245781000 | -0.630681000 | 1.616023000  |
|                                     | 14                               | -1.032097000 | -0.985361000 | -0.640175000 |
|                                     | 14                               | -0.601363000 | 0.961652000  | 1.125262000  |
|                                     | 14                               | -0.244913000 | 1.398408000  | -1.341354000 |

|                                     |    |              |              |              |
|-------------------------------------|----|--------------|--------------|--------------|
|                                     | 14 | -2.482172000 | 1.070816000  | -0.472742000 |
|                                     | 14 | -3.386410000 | -1.113056000 | -0.562213000 |
|                                     | 14 | 1.225726000  | 2.207721000  | 0.436767000  |
|                                     | 67 | 1.831912000  | -0.607955000 | -0.033761000 |
| <b>HoSi<sub>7</sub><sup>-</sup></b> | 14 | -2.194717000 | 2.336579000  | 0.000011000  |
|                                     | 14 | -1.687142000 | 0.000322000  | -0.000035000 |
|                                     | 14 | -0.291262000 | -1.629326000 | -1.292776000 |
|                                     | 14 | -0.290409000 | 1.629595000  | -1.292620000 |
|                                     | 14 | -0.291266000 | -1.629345000 | 1.292756000  |
|                                     | 14 | -0.290435000 | 1.629528000  | 1.292656000  |
|                                     | 14 | -2.195670000 | -2.335737000 | 0.000002000  |
|                                     | 67 | 1.513024000  | -0.000338000 | 0.000002000  |

**Figure S1.** Equilibrium shapes of the lowest-energy isomers for Si<sub>7</sub>M<sup>0/-</sup> clusters using DFT calculations. The red and blue balls denote Si and M atoms, respectively.

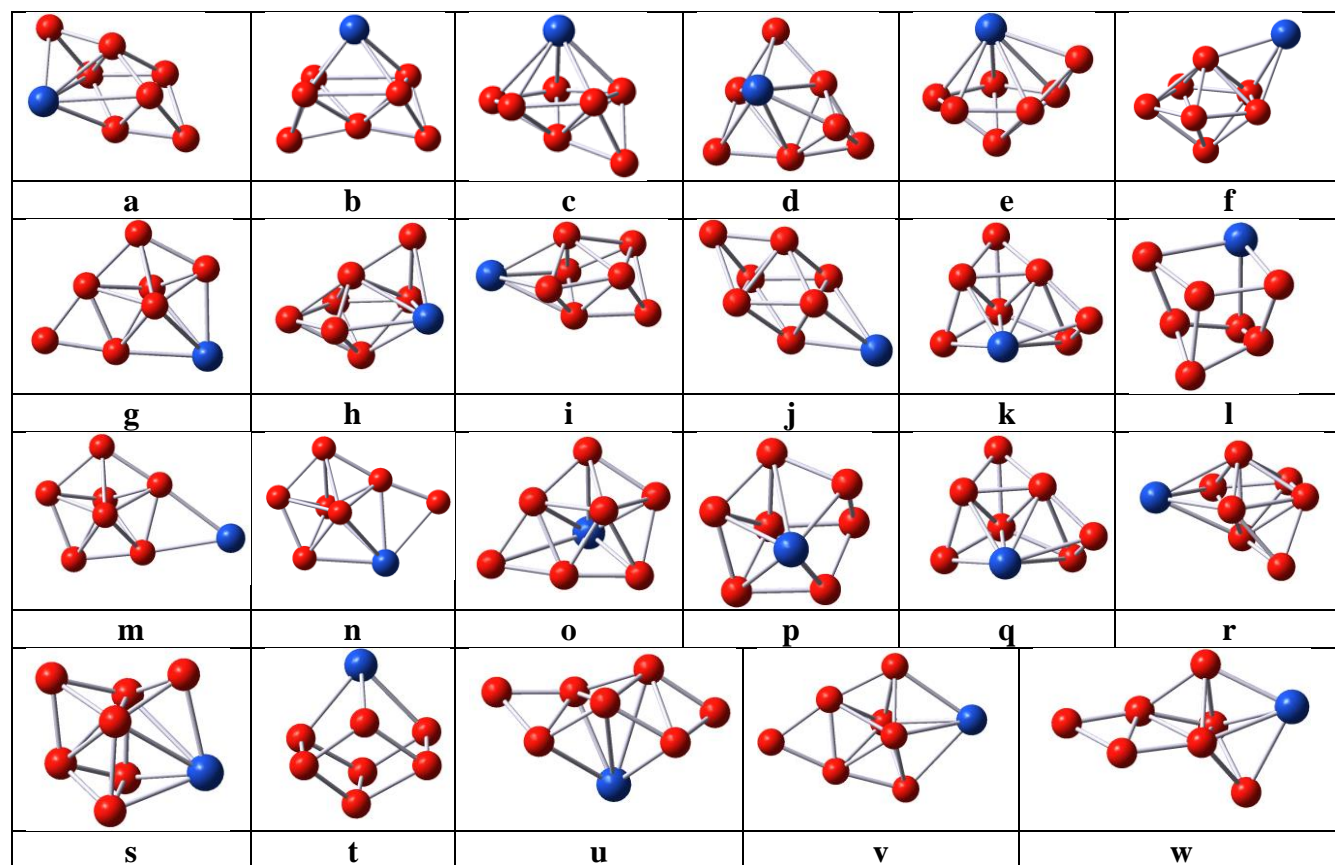

**Figure S2.** Shapes, electronic states and relative energies of the most stable forms of the neutral and anionic  $\text{Si}_7\text{Pr}^{0/-}$  clusters using B3LYP, PBE, BPW91, BP86 and TPSSh functionals.

|                |                                                                                    |                                                                                    |                                                                                    |                                                                                     |                                                                                      |                                                                                     |
|----------------|------------------------------------------------------------------------------------|------------------------------------------------------------------------------------|------------------------------------------------------------------------------------|-------------------------------------------------------------------------------------|--------------------------------------------------------------------------------------|-------------------------------------------------------------------------------------|
| <b>Neutral</b> | 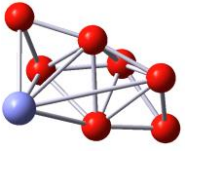  |   |   |   |   |  |
| Functional     | <b>Pr-n-1</b> ( $C_1$ , $^4A$ )                                                    | <b>Pr-n-2</b> ( $C_1$ , $^4A$ )                                                    | <b>Pr-n-3</b> ( $C_1$ , $^4A$ )                                                    | <b>Pr-n-4</b> ( $C_1$ , $^4A$ )                                                     | <b>Pr-n-5</b> ( $C_1$ , $^4A$ )                                                      | <b>Pr-n-6</b> ( $C_1$ , $^4A$ )                                                     |
| <b>B3lyp</b>   | 0.0                                                                                | 1.2                                                                                | 1.3                                                                                | 3.6                                                                                 | 5.6                                                                                  | 6.0                                                                                 |
| <b>PBE</b>     | 0.0                                                                                | 0.2                                                                                | 3.1                                                                                | 2.8                                                                                 | 5.4                                                                                  | 5.0                                                                                 |
| <b>BPW91</b>   | 0.0                                                                                | 0.3                                                                                | 2.2                                                                                | 2.2                                                                                 | 4.8                                                                                  | 4.9                                                                                 |
| <b>TPSSh</b>   | 0.0                                                                                | 1.8                                                                                | 2.9                                                                                | 8.6                                                                                 | 4.0                                                                                  | 5.0                                                                                 |
| <b>BP86</b>    | 0.1                                                                                | 0.0                                                                                | 1.9                                                                                | 1.3                                                                                 | 5.4                                                                                  | 5.3                                                                                 |
| <b>Anion</b>   |  |  |  |  |  |                                                                                     |
| Functional     | <b>Pr-a-1</b> ( $C_{2v}$ , $^3A_2$ )                                               | <b>Pr-a-2</b> ( $C_1$ , $^3A$ )                                                    | <b>Pr-a-3</b> ( $C_1$ , $^3A$ )                                                    | <b>Pr-a-4</b> ( $C_1$ , $^5A$ )                                                     | <b>Pr-a-5</b> ( $C_1$ , $^5A$ )                                                      |                                                                                     |
| <b>B3lyp</b>   | 0.0                                                                                | 0.5                                                                                | 1.0                                                                                | 5.5                                                                                 | 8.6                                                                                  |                                                                                     |
| <b>PBE</b>     | 0.0                                                                                | 1.1                                                                                | 0.5                                                                                | 5.2                                                                                 | 12.6                                                                                 |                                                                                     |
| <b>BPW91</b>   | 0.0                                                                                | 7.8                                                                                | 0.7                                                                                | 5.4                                                                                 | 12.1                                                                                 |                                                                                     |
| <b>TPSSH</b>   | 0.0                                                                                | 2.0                                                                                | 17.9                                                                               | 6.1                                                                                 | 10.5                                                                                 |                                                                                     |
| <b>BP86</b>    | 0.0                                                                                | 0.1                                                                                | 13.4                                                                               | 2.8                                                                                 | 8.9                                                                                  |                                                                                     |

**Figure S3.** Shapes, electronic states and relative energies of the most stable forms of the neutral and anionic Si<sub>7</sub>Gd<sup>0/-</sup> clusters using B3LYP, PBE, BPW91, BP86 and TPSSH functionals.

|                |                                                                                    |                                                                                    |                                                                                    |                                                                                    |                                                                                     |                                                                                      |                                                                                      |
|----------------|------------------------------------------------------------------------------------|------------------------------------------------------------------------------------|------------------------------------------------------------------------------------|------------------------------------------------------------------------------------|-------------------------------------------------------------------------------------|--------------------------------------------------------------------------------------|--------------------------------------------------------------------------------------|
| <b>Neutral</b> | 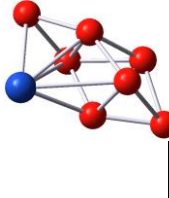  |   |   |   |   |   |   |
| Functional     | <b>Gd-n-1</b> (C <sub>1</sub> ,<br><sup>9</sup> A)                                 | <b>Gd-n-2</b> (C <sub>1</sub> , <sup>9</sup> A)                                    | <b>Gd-n-3</b> (C <sub>1</sub> , <sup>9</sup> A)                                    | <b>Gd-n-4</b> (C <sub>1</sub> ,<br><sup>9</sup> A)                                 | <b>Gd-n-5</b> (C <sub>1</sub> , <sup>9</sup> A)                                     | <b>Gd-n-6</b> (C <sub>1</sub> , <sup>9</sup> A)                                      | <b>Gd-n-7</b> (C <sub>1</sub> , <sup>9</sup> A)                                      |
| <b>B3lyp</b>   | 0.0                                                                                | 2.9                                                                                | 6.1                                                                                | 7.9                                                                                | 8.8                                                                                 | 7.9                                                                                  | 9.6                                                                                  |
| <b>PBE</b>     | 0.0                                                                                | 2.0                                                                                | 4.4                                                                                | 5.8                                                                                | 6.4                                                                                 | 7.0                                                                                  | 8.4                                                                                  |
| <b>BPW91</b>   | 0.0                                                                                | 2.0                                                                                | 4.2                                                                                | 6.0                                                                                | 6.2                                                                                 | 7.0                                                                                  | 6.9                                                                                  |
| <b>TPSSH</b>   | 0.0                                                                                | 1.8                                                                                | 3.7                                                                                | 5.6                                                                                | 6.9                                                                                 | 6.8                                                                                  | 7.9                                                                                  |
| <b>BP86</b>    | 0.0                                                                                | 2.3                                                                                | 4.6                                                                                | 6.1                                                                                | 6.4                                                                                 | 7.3                                                                                  | 6.9                                                                                  |
| <b>Anion</b>   |  |  |  |  |  |  |  |
| Functional     | <b>Gd-a-1</b> (C <sub>2v</sub> ,<br><sup>8</sup> A <sub>2</sub> )                  | <b>Gd-a-2</b> (C <sub>1</sub> ,<br><sup>10</sup> A)                                | <b>Gd-a-3</b> (C <sub>1</sub> , <sup>10</sup> A)                                   | <b>Gd-a-4</b> (C <sub>1</sub> ,<br><sup>10</sup> A)                                | <b>Gd-a-5</b> (C <sub>1</sub> , <sup>10</sup> A)                                    | <b>Gd-a-6</b> (C <sub>1</sub> , <sup>8</sup> A)                                      | <b>Gd-a-7</b> (C <sub>1</sub> , <sup>8</sup> A)                                      |
| <b>B3LYP</b>   | 0.0                                                                                | 1.3                                                                                | 1.5                                                                                | 2.9                                                                                | 4.0                                                                                 | 4.9                                                                                  | 6.2                                                                                  |
| <b>PBE</b>     | 0.0                                                                                | 3.6                                                                                | 1.5                                                                                | 1.8                                                                                | 6.1                                                                                 | 4.1                                                                                  | 4.6                                                                                  |
| <b>BPW91</b>   | 0.0                                                                                | 2.7                                                                                | 1.3                                                                                | 1.8                                                                                | 6.3                                                                                 | 2.9                                                                                  | 5.0                                                                                  |
| <b>TPSSH</b>   | 0.0                                                                                | 5.1                                                                                | 3.6                                                                                | 3.6                                                                                | 9.8                                                                                 | 3.5                                                                                  | 5.2                                                                                  |
| <b>BP86</b>    | 0.0                                                                                | 2.2                                                                                | 1.0                                                                                | 1.6                                                                                | 5.4                                                                                 | 2.2                                                                                  | 5.1                                                                                  |

**Figure S4.** Shapes, electronic states and relative energies of the most stable forms of the neutral and anionic Si<sub>7</sub>Ho<sup>0/-</sup> clusters using B3LYP, PBE, BPW91, BP86 and TPSSH functionals.

|                |                                                                                   |                                                                                   |                                                                                   |                                                                                    |                                                                                     |                                                                                     |
|----------------|-----------------------------------------------------------------------------------|-----------------------------------------------------------------------------------|-----------------------------------------------------------------------------------|------------------------------------------------------------------------------------|-------------------------------------------------------------------------------------|-------------------------------------------------------------------------------------|
| <b>Neutral</b> | 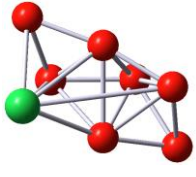 |  |  |  |  |  |
| Functional     | <b>Ho-n-1</b> (C <sub>1</sub> , <sup>4</sup> A)                                   | <b>Ho-n-2</b> (C <sub>1</sub> , <sup>4</sup> A)                                   | <b>Ho-n-3</b> (C <sub>1</sub> , <sup>4</sup> A)                                   | <b>Ho-n-4</b> (C <sub>1</sub> , <sup>6</sup> A)                                    | <b>Ho-n-5</b> (C <sub>1</sub> , <sup>4</sup> A)                                     | <b>Ho-n-6</b> (C <sub>1</sub> , <sup>4</sup> A)                                     |
| <b>B3LYP</b>   | 0.0                                                                               | 7.6                                                                               | 9.1                                                                               | 9.4                                                                                | 9.7                                                                                 | 11.7                                                                                |
| <b>PBE</b>     | 0.0                                                                               | 5.6                                                                               | 8.4                                                                               | 9.8                                                                                | 7.4                                                                                 | 8.4                                                                                 |
| <b>BPW91</b>   | 0.0                                                                               | 6.0                                                                               | 4.9                                                                               | 9.7                                                                                | 6.2                                                                                 | 7.9                                                                                 |
| <b>TPSSH</b>   | 0.0                                                                               | 6.1                                                                               | 7.3                                                                               | 11.0                                                                               | 4.0                                                                                 | 6.4                                                                                 |
| <b>BP86</b>    | 0.0                                                                               | 6.1                                                                               | 4.1                                                                               | 9.8                                                                                | 8.0                                                                                 | 8.2                                                                                 |
| <b>Anion</b>   |  |  |  |  |  |  |
| Functional     | <b>Ho-a-1</b> (C <sub>1</sub> , <sup>5</sup> B <sub>2</sub> )                     | <b>Ho-a-2</b> (C <sub>1</sub> , <sup>5</sup> A)                                   | <b>Ho-a-3</b> (C <sub>1</sub> , <sup>5</sup> A)                                   | <b>Ho-a-4</b> (C <sub>1</sub> , <sup>5</sup> A)                                    | <b>Ho-a-5</b> (C <sub>1</sub> , <sup>5</sup> A)                                     | <b>Ho-a-6</b> (C <sub>1</sub> , <sup>5</sup> A)                                     |
| <b>B3LYP</b>   | 0.0                                                                               | 0.6                                                                               | 1.0                                                                               | 1.3                                                                                | 4.0                                                                                 | 2.5                                                                                 |
| <b>PBE</b>     | 1.1                                                                               | 0.0                                                                               | 2.5                                                                               | 3.8                                                                                | 3.8                                                                                 | 10.8                                                                                |
| <b>BPW91</b>   | 1.8                                                                               | 0.0                                                                               | 1.0                                                                               | 2.7                                                                                | 6.5                                                                                 | 10.6                                                                                |
| <b>TPSSH</b>   | 1.7                                                                               | 1.3                                                                               | 0.0                                                                               | 8.2                                                                                | 4.0                                                                                 | 1.7                                                                                 |
| <b>BP86</b>    | 2.0                                                                               | 0.0                                                                               | 0.8                                                                               | 3.7                                                                                | 6.8                                                                                 | 10.5                                                                                |
